# Supplementary material for: Early effects of crop tree management on undergrowth plant diversity and soil physicochemical properties in a Pinus massoniana plantation
Source: PeerJ. 2021 Jul 29;9:e11852. doi: 10.7717/peerj.11852 (PMC8325914; doi:10.7717/peerj.11852)
Supplement: Supplemental Information 1 — SOM: Soil Organic matter AP: Available potassium AN: Soil hydrolysable nitrogen AK: Available potassium SM: Soil moisture BD: Bulk density. A (crop tree densities of 100 N/ha), B (crop tree densities of 150 N/ha), C (crop tree densities of 200 N/ha). R1: The richness index of the shrub layer, R2: The richness index of the herb layer, H1: The Shannon–Wiener index of the shrub layer, H2: The Shannon–Wiener index of the herb layer, D1: The simpson index of the shrub layer, D2: The Simpson index of the herb layer, J1: The Pielou index of the shrub layer, J2: The Pielou index of the herb layer. [file peerj-09-11852-s001.xlsx]

## Sheet: 0-10cm soil
Treatment	pH	SOM(mg/kg)	AP(mg/kg)	AN(mg/kg)	AK(mg/kg)	SW(%)	BD(g/cm3 )
CK	3.71	28.1119	1.65163	301.075	79.043	24.5216	1.4
CK	3.65	19.4271	1.20393	210.753	80.7283	23.0447	1.39
CK	3.65	9.03862	1.10038	301.792	81.9832	23.8191	1.41
A	3.5	34.44	5.22827	301.075	65.5664	28.7206	1.3
A	3.32	33.256	3.57795	301.434	64.4442	26.3731	1.32
A	3.61	36.9354	5.15261	341.219	63.664	26.4778	1.28
B	3.37	18.6791	5.20323	120.43	70.775	24.4071	1.36
B	3.48	21.4985	7.42534	281.004	74.432	22.8879	1.33
B	3.82	28.5585	5.22889	222.581	71.7554	23.8865	1.39
C	3.73	31.4302	5.92543	481.72	70.774	26.488	1.33
C	3.45	41.839	6.60822	481.362	65.664	26.9617	1.32
C	3.46	43.8296	3.57888	481.72	68.654	26.5664	1.34
A (crop tree densities of 100 N/ha), B (crop tree densities of 150 N/ha), C (crop tree densities of 200 N/ha).

## Sheet: 10-20cm soil
Treatment	pH	SOM(mg/kg)	AP(mg/kg)	AN(mg/kg)	AK(mg/kg)	SW(%)	BD(g/cm3 )
CK	3.71	25.3599	6.32642	201.434	78.9393	28.1867	1.41
CK	3.64	23.2127	1.10111	281.004	77.9929	22.411	1.44
CK	3.65	25.5069	0.824922	260.932	73.292	22.6401	1.38
A	3.53	14.8375	4.12857	301.075	59.828	24.6685	1.4
A	3.47	21.9416	6.60215	361.29	58.762	23.4789	1.42
A	3.29	21.4344	4.13047	300.717	58.727	24.1677	1.38
B	3.3	17.2453	7.15619	311.111	67.6263	23.5067	1.41
B	3.59	29.5141	6.32529	361.649	56.8737	22.2746	1.43
B	3.49	41.1888	6.6069	381.362	64.728	23.3654	1.39
C	3.66	47.2335	3.30002	401.434	60.837	24.1614	1.41
C	3.4	25.4847	4.95716	400.86	62.839	23.7877	1.42
C	3.44	24.6644	4.68045	401.434	61.834	23.9643	1.4
A (crop tree densities of 100 N/ha), B (crop tree densities of 150 N/ha), C (crop tree densities of 200 N/ha).

## Sheet: plant diversity
Treatment	R1	D1	H1	J1	R2	D2	H2	J2
CK	13	0.894133	1.03909	0.932803	12	0.846868	0.927291	0.859254
CK	13	0.90121	1.05903	0.95533	12.2	0.8575	0.93554	0.8533
CK	13	0.88677	1.01934	0.911875	12.1	0.8364	0.9177	0.8596
A	21	0.768994	1.25811	0.951517	15	0.903663	1.07491	0.913969
A	21	0.77967	1.27933	0.953311	14.99	0.90362	1.0872	0.9144
A	21	0.74876	1.23995	0.953221	15.02	0.90368	1.06075	0.9021
B	21	0.834359	1.35726	0.951131	15.1	0.881438	1.0251	0.871614
B	21	0.73023	1.16311	0.950929	15.2	0.8965	1.02533	0.87544
B	21	0.738994	1.25811	0.951517	15	0.8685	1.02577	0.8732
C	27	0.891155	1.28053	0.894622	14	0.906352	1.07366	0.936768
C	27	0.867	1.26786	0.860828	13.9	0.9133	1.0744	0.9366
C	27	0.87932	1.29453	0.92221	14.1	0.8965	1.07244	0.9385
R1: The richness index of the shrub layer, R2: The richness index of the herb layer, H1: The Shannon-Wiener index of the shrub layer, H2: The Shannon-Wiener index of the herb layer, D1: The simpson index of the shrub layer, D2: The Simpson index of the herb layer, J1: The Pielou index of the shrub layer, J2: The Pielou index of the herb layer
A (crop tree densities of 100 N/ha), B (crop tree densities of 150 N/ha), C (crop tree densities of 200 N/ha).

## Sheet: Abandunce of shrub layer
Treatment	1	2	3	4	5	6	7	8	9	10	11	12	13	14	15	16	17	18	19	20	21	22	23	24	25	26	27	28	29	30	31	32	33	34	35	36
species	Myrsine africana	Cinnamomum camphora	Rubus pirifolius	Mallotus barbatus	Aralia chinensis	Eurya brevistyla	Smilax china	Litsea pungens	Callicarpa giraldii	Melastoma malabathricum	Ardisia japonica	Quercus serrata	Serissa japonica	Rubus buergeri	Smilax discotis	Gardenia jasminoides	Ficus pandurata	Pithecellobium lucidum	Urena lobata	Smilax arisanensis	Callicarpa bodinieri	Rhododendron simsii	Rubus corchorifolius	Lonicera japonica	Mallotus philippensis	Ardisia crispa	Pericampylus glaucus	Ampelopsis delavayana	Millettia congestiflora	Debregeasia orientalis	Rhus chinensis	Symplocos lancifolia	Broussonetia kaempferi	Lespedeza bicolor	Dalbergia hupeana	Ficus henryi
CK	0	18.75	4.46429	9.82143	0	2.67857	0	6.25	0	5.35714	0	12.5	5.35714	0	0	4.46429	4.46429	0	8.92857	0	0	0	0	0	0	0	0	0	0	14.2857	2.67857	0	0	0	0	0
CK	0	20	3.3	9.33	0	1.67857	0	5.25	0	9.57	0	11.5	4.35714	0	0	5.88	6.55	0	7.1	0	0	0	0	0	0	0	0	0	0	13.2857	2.2	0	0	0	0	0
CK	0	19.75	4.387	9.574	0	3.67857	0	7.25	0	4.874	0	11.9852	4.887	0	0	5.01787	5.46429	0	8.045	0	0	0	0	0	0	0	0	0	0	12.587	2.5454	0	0	0	0	0
A	4.90196	5.88235	0	5.88235	0	6.86275	0	9.80392	0.980392	1.96078	24.5098	5.88235	0	0	0	0.980392	5.88235	0	4.90196	0	0	0.980392	4.90196	0	0	0	2.94118	0.980392	2.94118	0	0	0.980392	2.94118	0	2.94118	1.96078
A	5.40196	6.38235	0	6.38235	0	7.36275	0	10.3039	1.48039	2.46078	25.0098	6.38235	0	0	0	1.48039	6.38235	0	5.40196	0	0	1.48039	5.40196	0	0	0	3.44118	1.48039	3.44118	0	0	1.48039	3.44118	0	3.44118	2.46078
A	4.40196	5.38235	0	6.8712	0	8.5456	0	9.30392	1.2654	3.2156	26.4315	5.38235	0	0	0	0.480392	6.5887	0	4.40196	0	0	0.480392	3.15456	0	0	0	2.44118	1.59694	2.44118	0	0	0.480392	2.44118	0	2.44118	2.2548
B	8.46154	5.38462	5.38462	7.69231	0.769231	5.38462	3.84615	8.46154	0	5.38462	4.61538	10.7692	0	0	3.84615	3.07692	6.15385	0	1.53846	3.84615	0	0	2.30769	0	0	0	5.38462	0.769231	3.84615	0	0	0	0	3.07692	0	0
B	8.5542	6.9745	4.2165	6.2587	0.575	4.215	5.3114	9.0248	0	4.231	5.6245	11.0289	0	0	4.2687	3.0248	7.2152	0	1.711	3.297	0	0	3.2488	0	0	0	4.0289	0.9614	3.028	0	0	0	0	3.21	0	0
B	9.02415	4.2264	6.23321	7.024	0.6694	5.2415	4.267	8.554	0	6.3145	6.02523	11.1041	0	0	3.25584	3.02445	6.95415	0	1.25235	3.025	0	0	3.05945	0	0	0	5.0254	0.56124	2.4587	0	0	0	0	2.7	0	0
C	4.29799	6.01719	7.44986	10.0287	1.43266	3.72493	2.86533	10.3152	0.573066	11.1748	3.15186	8.02292	0.859599	1.7192	2.29226	4.58453	4.58453	0.573066	0.573066	2.86533	0.573066	3.4384	1.14613	0.573066	0.286533	2.86533	4.01146	0	0	0	0	0	0	0	0	0
C	5.0211	6.25478	6.8941	9.215	1.465	2.791	3.2564	10.658	0.8644	12.0574	3.648	9.254	1.089	1.9694	2.0791	4.3944	5.06974	0.76141	0.649674	2.0254	0.5545	3.2574	1.35984	0.6445	0.28	1.3644	3.12874	0	0	0	0	0	0	0	0	0
C	4.664	6.2416	6.0255	10.252	1.6545	3.6894	2.69875	11.0233	0.5264	13.0252	3.02152	9.612	0.721212	1.83212	2.106	4.0221	5.02241	0.6215	0.6302	2.15256	0.56445	3.3125	1.355	0.64141	0.2594	2.4574	1.8677	0	0	0	0	0	0	0	0	0
A (crop tree densities of 100 N/ha), B (crop tree densities of 150 N/ha), C (crop tree densities of 200 N/ha).

## Sheet: Abandunce of herb layer
Treatment	37	38	39	40	41	42	43	44	45	46	47	48	49	50	51	52	53	54	55	56	57	58	59	60
Species	Lophatherum gracile	Woodwardia japonica	Dendranthema indicum	Dryopteris fuscipes	Parathelypteris glanduligera	Erigeron annuus	Setaria plicata	Oxalis corniculata	Sanguisorba officinalis	Cyrtomium fortunei	Lygodium japonicum	Capillipedium parviflorum	Dicranopteris dichotoma	Blumea megacephala	Alpinia japonica	Oplismenus compositus	Liriope spicata	Stenoloma chusanum	Dioscorea opposita	Microlepia hancei	Arthraxon hispidus	Pteridium aquilinum	Miscanthus sinensis	Iris tectorum
CK	3.22581	3.87097	3.87097	11.6129	6.45161	0.645161	29.6774	7.74194	0	0	0	0	0	0	0	0	0	0	0	0	2.58065	3.87097	12.2581	14.1935
CK	3.645	3.902	3.641	10.945	7.032	0.569	28.314	6.213	0	0	0	0	0	0	0	0	0	0	0	0	3.216	5.464	13.024	14.035
CK	2.801	3.784	4.024	11.364	5.697	0.764	29.341	8.951	0	0	0	0	0	0	0	0	0	0	0	0	2.035	4.364	12.61	14.265
A	6.14035	0	0.877193	8.77193	0	0	9.64912	0	0.877193	2.63158	1.75439	0	12.2807	0	0	0	2.63158	6.14035	0	7.01754	9.64912	7.01754	7.01754	17.5439
A	5.564	0	0.921	8.945	0	0	9.324	0	0.94	2.421	1.764	0	12.155	0	0	0	2.354	5.945	0	6.854	9.954	6.954	7.657	18.248
A	6.215	0	0.859	8.024	0	0	9.935	0	0.795	2.655	1.625	0	11.955	0	0	0	2.964	7.115	0	8.364	9.365	8.264	6.494	15.371
B	2.5641	9.40171	0	22.2222	0	0	9.40171	3.4188	0	0	0.854701	1.7094	4.2735	0	0	3.4188	0	0	1.7094	13.6752	2.5641	2.5641	13.6752	8.54701
B	2.352	9.684	0	23.454	0	0	9.245	3.032	0	0	0.798	1.952	4.024	0	0	3.155	0	0	1.931	13.025	2.924	2.015	15	7.409
B	2.712	9.264	0	21.063	0	0	9.688	3.895	0	0	0.954	1.854	4.562	0	0	3.415	0	0	2.155	13.526	3.025	3.0254	11.255	9.6066
C	6.29371	9.79021	0	3.4965	0	4.8951	7.69231	0	0	0	0	0	8.39161	6.29371	0.699301	0	2.7972	15.3846	0	13.2867	2.7972	8.39161	9.79021	0
C	7.342	9.012	0	4.135	0	4.025	8.256	0	0	0	0	0	8.011	7.155	0.712	0	2.658	14.358	0	12.236	3.025	9.655	9.42	0
C	5.955	10.456	0	3.864	0	5.645	7.325	0	0	0	0	0	8.645	7.021	0.541	0	2.311	15.351	0	13.015	2.46	7.624	9.787	0
A (crop tree densities of 100 N/ha), B (crop tree densities of 150 N/ha), C (crop tree densities of 200 N/ha).

## Sheet: raw data for Table 1
Treatment	Before crop tree management		After crop tree management
	DBH(cm)	Tree height(m)	DBH(cm)	Tree height(m)
CK	19.84	10.05
CK	19.8	10.07
CK	19.88	10.03
A	19	10.62	19.41	10.56
A	19.04	10.5	19.96	10.46
A	18.96	10.55	19.25	10.47
B	19.8	12.03	20.04	11.94
B	19.5	12.1	19.9	12.04
B	20.1	12.62	20.1	12.08
C	19.9	11.31	19.82	11.02
C	19.7	11.02	19.92	11.01
C	19.5	11.12	19.99	11.05
A (crop tree densities of 100 N/ha), B (crop tree densities of 150 N/ha), C (crop tree densities of 200 N/ha).
